# Supplementary material for: The roles of health culture and physical environment in workplace health promotion: a two-year prospective intervention study in China
Source: PubMed Central journal article supplement (PMC5887264; doi:10.1186/s12889-018-5361-5), 2018-04-05
Supplement: 12889_2018_5361_MOESM2_ESM.pdf [file 12889_2018_5361_MOESM2_ESM.pdf]

**Table. Direct Observation Scoring Table for workplace**

**Workplace :** \_\_\_\_\_

**Judge:** \_\_\_\_\_                      **Time:** \_\_\_\_\_

|                                                     |                   |                |
|-----------------------------------------------------|-------------------|----------------|
| <b>1. Overall environment</b>                       | <b>Full score</b> | <b>Ratings</b> |
| The overall situation of sanitation                 | 5                 |                |
| Allocation of health bulletin board                 | 5                 |                |
| Using and updating for health bulletin board        | 5                 |                |
| <b>2. Physical activity environment</b>             | <b>Full score</b> | <b>Ratings</b> |
| There is enough space for exercises                 | 5                 |                |
| There are various fitness equipment                 | 5                 |                |
| Good availability of the stairwell                  | 5                 |                |
| <b>1. Tobacco control environment</b>               | <b>Full score</b> |                |
| The settings of smoking area are reasonable         | 5                 |                |
| No smoking ashtrays in the office                   | 5                 |                |
| There are obvious signs for tobacco control         | 5                 |                |
| <b>4. Nutritional/dietary environment</b>           | <b>Full score</b> | <b>Ratings</b> |
| Sanitary condition of dining hall is good           | 5                 |                |
| Balanced diets, vegetables, and fruits are provided | 5                 |                |
| Knowledge about healthy diet is well promoted       | 5                 |                |
| <b>Total score</b>                                  | <b>60</b>         |                |
