# Supplementary material for: The roles of health culture and physical environment in workplace health promotion: a two-year prospective intervention study in China
Source: PubMed Central journal article supplement (PMC5887264; doi:10.1186/s12889-018-5361-5), 2018-04-05
Supplement: 12889_2018_5361_MOESM3_ESM.pdf [file 12889_2018_5361_MOESM3_ESM.pdf]

## Additional results

**Table 1. Demographic characteristics of participants by organization**

| Workplace   | Number of participants | Variable       | Mean  | Standard deviation | Min | 5th percentile | 95th percentile | Max |
|-------------|------------------------|----------------|-------|--------------------|-----|----------------|-----------------|-----|
| Workplace 1 | 89                     | Gender         | 1.40  | 0.49               | 1   | 1              | 2               | 2   |
|             |                        | Age            | 42.46 | 10.16              | 24  | 26             | 58              | 63  |
|             |                        | Marital status | 1.0   | 0.29               | 1   | 1              | 2               | 2   |
|             |                        | Education      | 3.33  | 0.81               | 1   | 2              | 4               | 4   |
| Workplace 2 | 64                     | Gender         | 1.67  | 0.47               | 1   | 1              | 2               | 2   |
|             |                        | Age            | 33.17 | 7.28               | 25  | 26             | 49              | 56  |
|             |                        | Marital status | 1.11  | 0.31               | 1   | 1              | 2               | 2   |
|             |                        | Education      | 3.83  | 0.42               | 2   | 3              | 4               | 4   |
| Workplace 3 | 77                     | Gender         | 1.44  | 0.50               | 1   | 1              | 2               | 2   |
|             |                        | Age            | 41    | 9.23               | 23  | 27             | 56              | 58  |
|             |                        | Marital status | 1.04  | 0.19               | 1   | 1              | 1               | 2   |
|             |                        | Education      | 3.16  | 1.01               | 1   | 1              | 4               | 4   |
| Workplace 4 | 90                     | Gender         | 1.43  | 0.50               | 1   | 1              | 2               | 2   |
|             |                        | Age            | 41.22 | 8.40               | 25  | 29             | 54              | 59  |
|             |                        | Marital status | 1.02  | 0.15               | 1   | 1              | 1               | 2   |
|             |                        | Education      | 3.16  | 1.17               | 1   | 1              | 4               | 4   |
| Workplace 5 | 83                     | Gender         | 1.46  | 0.50               | 1   | 1              | 2               | 2   |
|             |                        | Age            | 41.46 | 10.42              | 22  | 26             | 58              | 62  |
|             |                        | Marital status | 1.05  | 0.21               | 1   | 1              | 1               | 2   |
|             |                        | Education      | 2.99  | 0.97               | 1   | 1              | 4               | 4   |
| Workplace 6 | 73                     | Gender         | 1.49  | 0.50               | 1   | 1              | 2               | 2   |
|             |                        | Age            | 37.37 | 10.39              | 23  | 24             | 54              | 59  |
|             |                        | Marital status | 1.16  | 0.37               | 1   | 1              | 2               | 2   |
|             |                        | Education      | 3.18  | 0.99               | 1   | 1              | 4               | 4   |
| Workplace 7 | 56                     | Gender         | 1.52  | 0.50               | 1   | 1              | 2               | 2   |
|             |                        | Age            | 38.96 | 9.92               | 24  | 25             | 56              | 57  |
|             |                        | Marital status | 1.11  | 0.31               | 1   | 1              | 2               | 2   |
|             |                        | Education      | 3.45  | 0.97               | 1   | 1              | 4               | 4   |
| Workplace 8 | 63                     | Gender         | 1.57  | 0.50               | 1   | 1              | 2               | 2   |

|              |    |                |       |       |    |    |    |    |
|--------------|----|----------------|-------|-------|----|----|----|----|
|              |    | Age            | 41.27 | 9.25  | 24 | 27 | 54 | 57 |
|              |    | Marital status | 1.16  | 0.37  | 1  | 1  | 2  | 2  |
|              |    | Education      | 3.73  | 0.54  | 2  | 3  | 4  | 4  |
| Workplace 9  | 61 | Gender         | 1.34  | 0.48  | 1  | 1  | 2  | 2  |
|              |    | Age            | 38.75 | 8.67  | 22 | 25 | 54 | 57 |
|              |    | Marital status | 1.13  | 0.34  | 1  | 1  | 2  | 2  |
|              |    | Education      | 3.20  | 1.12  | 1  | 1  | 4  | 4  |
| Workplace 10 | 63 | Gender         | 1.49  | 0.50  | 1  | 1  | 2  | 2  |
|              |    | Age            | 39.33 | 10.13 | 23 | 24 | 54 | 57 |
|              |    | Marital status | 1.25  | 0.44  | 1  | 1  | 2  | 2  |
|              |    | Education      | 3.54  | 0.62  | 2  | 2  | 4  | 4  |

For gender, 1 represents male, and 2 represents female. For marital status, 1 represents married, and 2 represents unmarried/divorced/widowed. For education, 1, 2, 3 and 4 represent junior high school, high school/technical secondary school, junior college, and bachelor or higher degree, respectively.

**Table 2. Differences in gender, marital status, and education among the participants across the 10 organizations**

| Organization | Gender         |                 | Marital status   |                                      | Education                   |                                                 |                         |                                    |
|--------------|----------------|-----------------|------------------|--------------------------------------|-----------------------------|-------------------------------------------------|-------------------------|------------------------------------|
|              | Male<br>n (%)  | Female<br>n (%) | Married<br>n (%) | Unmarried/divorced/w<br>idowed n (%) | Junior high school<br>n (%) | High school/technical<br>secondary school n (%) | Junior college<br>n (%) | Bachelor or higher<br>degree n (%) |
| Workplace 1  | 53(59.6)       | 36(40.4)        | 81(91.0)         | 8(9.0)                               | 4(4.5)                      | 7(7.9)                                          | 34(38.2)                | 44(49.4)                           |
| Workplace 2  | 21(32.8)       | 43(67.2)        | 57(89.1)         | 7(10.9)                              | 0                           | 1(1.6)                                          | 9(14.1)                 | 54(84.4)                           |
| Workplace 3  | 43(55.8)       | 34(44.2)        | 74(96.1)         | 3(3.9)                               | 8(10.4)                     | 10(13.0)                                        | 21(27.3)                | 38(49.4)                           |
| Workplace 4  | 51(56.7)       | 39(43.3)        | 88(97.8)         | 2(2.2)                               | 17(18.9)                    | 4(4.4)                                          | 17(18.9)                | 52(57.8)                           |
| Workplace 5  | 45(54.2)       | 38(43.3)        | 79(95.2)         | 4(4.8)                               | 6(7.2)                      | 21(25.3)                                        | 24(28.9)                | 32(38.6)                           |
| Workplace 6  | 37(50.7)       | 36(49.3)        | 61(83.6)         | 12(16.4)                             | 5(6.8)                      | 15(20.5)                                        | 15(20.5)                | 38(52.1)                           |
| Workplace 7  | 27(48.2)       | 29(51.8)        | 50(89.3)         | 6(10.7)                              | 5(8.9)                      | 4(7.1)                                          | 8(14.3)                 | 39(69.6)                           |
| Workplace 8  | 27(42.9)       | 36(57.1)        | 53(84.1)         | 10(15.9)                             | 0                           | 3(4.8)                                          | 11(17.5)                | 49(77.8)                           |
| Workplace 9  | 40(65.6)       | 21(34.4)        | 53(86.9)         | 8(13.1)                              | 9(14.8)                     | 6(9.8)                                          | 10(16.4)                | 36(59.0)                           |
| Workplace 10 | 32(50.8)       | 31(49.2)        | 47(74.6)         | 16(25.4)                             | 0                           | 4(6.3)                                          | 21(33.3)                | 38(60.3)                           |
| Total        | 376(52.3)      | 343(47.7)       | 643(89.4)        | 76(10.6)                             | 54(7.5)                     | 75(10.4)                                        | 170(23.6)               | 420(58.4)                          |
| $\chi^2$ (p) | 19.884 (0.019) |                 | 33.015 (<0.001)  |                                      | 1145(<0.001)                |                                                 |                         |                                    |

**Table 3. Differences in age and length of service among the participants across the 10 organizations**

| Organization         | Age (years) |              |                                  |                |                |              | Length of service (years) |             |                                  |               |                |              |  |
|----------------------|-------------|--------------|----------------------------------|----------------|----------------|--------------|---------------------------|-------------|----------------------------------|---------------|----------------|--------------|--|
|                      | N           | Mean (SD)    | <30<br>n (%)                     | 30–39<br>n (%) | 40–49<br>n (%) | ≥50<br>n (%) | N                         | Mean (SD)   | <5<br>n (%)                      | 5–14<br>n (%) | 15–24<br>n (%) | ≥25<br>n (%) |  |
| Workplace 1          | 89          | 42.46(10.16) | 8(9.0)                           | 30(33.7)       | 22(24.7)       | 29(32.6)     | 89                        | 11.72(8.75) | 21(23.6)                         | 40(44.9)      | 17(19.1)       | 11(12.4)     |  |
| Workplace 2          | 64          | 33.17(7.28)  | 21(32.8)                         | 33(51.6)       | 7(10.9)        | 3(4.7)       | 64                        | 5.72(5.23)  | 32(50.0)                         | 26(40.6)      | 5(7.8)         | 1(1.6)       |  |
| Workplace 3          | 77          | 41.00(9.23)  | 7(9.1)                           | 27(35.1)       | 25(32.5)       | 18(23.4)     | 77                        | 11.43(7.91) | 12(15.6)                         | 42(54.5)      | 16(20.8)       | 7(9.1)       |  |
| Workplace 4          | 90          | 41.22(8.40)  | 7(7.8)                           | 30(33.3)       | 36(40.0)       | 17(18.9)     | 90                        | 10.99(7.76) | 18(20.0)                         | 49(54.4)      | 15(16.7)       | 8(8.9)       |  |
| Workplace 5          | 83          | 41.46(10.42) | 11(13.3)                         | 27(32.5)       | 25(30.1)       | 20(24.1)     | 83                        | 10.41(7.22) | 16(19.3)                         | 51(61.4)      | 10(12.0)       | 6(7.2)       |  |
| Workplace 6          | 73          | 37.37(10.39) | 21(28.8)                         | 22(30.1)       | 18(24.7)       | 12(16.4)     | 73                        | 7.23(6.40)  | 32(43.8)                         | 30(41.1)      | 9(12.3)        | 2(2.7)       |  |
| Workplace 7          | 56          | 38.96(9.92)  | 16(28.6)                         | 12(21.4)       | 17(30.4)       | 11(19.6)     | 56                        | 10.48(7.98) | 13(23.2)                         | 27(48.2)      | 12(21.4)       | 4(7.1)       |  |
| Workplace 8          | 63          | 41.27(9.25)  | 10(15.9)                         | 13(20.6)       | 26(41.3)       | 14(22.2)     | 63                        | 11.56(9.70) | 20(31.7)                         | 26(41.3)      | 8(12.7)        | 9(14.3)      |  |
| Workplace 9          | 61          | 38.75(8.67)  | 10(16.4)                         | 20(32.8)       | 25(41.0)       | 6(9.8)       | 61                        | 9.07(7.37)  | 21(34.4)                         | 25(41.0)      | 14(23.0)       | 1(1.6)       |  |
| Workplace 10         | 63          | 39.33(10.13) | 18(28.6)                         | 8(12.7)        | 25(39.7)       | 12(19.0)     | 63                        | 10.52(7.98) | 16(25.4)                         | 30(47.6)      | 14(22.2)       | 3(4.8)       |  |
| Total                | 719         | 39.72(9.74)  | 129(17.9)                        | 222(30.9)      | 226(31.4)      | 142(19.7)    | 719                       | 10.02(7.90) | 201(28.0)                        | 346(48.1)     | 120(16.7)      | 52(7.2)      |  |
| F (p) / $\chi^2$ (p) |             |              | 5.768 (<0.001) / 92.225 (<0.001) |                |                |              |                           |             | 4.633 (<0.001) / 62.337 (<0.001) |               |                |              |  |

**Table 4. Descriptive statistics and t test results of SRH and mental health by organization**

| Organization | Self-rated health |                |                    |             |       |        | Mental health               |                          |                              |              |        |        |
|--------------|-------------------|----------------|--------------------|-------------|-------|--------|-----------------------------|--------------------------|------------------------------|--------------|--------|--------|
|              | N                 | Mean (SD)      |                    |             | t     | p      | N                           | Mean (SD)                |                              |              | t      | p      |
|              | SRH<br>(baseline) | SRH<br>(final) | SRH<br>improvement |             |       |        | Mental health<br>(baseline) | Mental health<br>(final) | Mental health<br>improvement |              |        |        |
| Workplace 1  | 89                | 2.85 (0.79)    | 3.10 (0.92)        | 0.25 (0.95) | 2.468 | 0.016  | 88                          | 14.22 (4.87)             | 18.64 (4.83)                 | 4.42 (6.68)  | 6.207  | <0.001 |
| Workplace 2  | 64                | 3.03 (0.84)    | 3.23 (0.81)        | 0.20 (0.86) | 1.894 | 0.063  | 62                          | 14.92 (5.31)             | 16.45 (4.18)                 | 1.53 (5.01)  | 2.410  | <0.019 |
| Workplace 3  | 77                | 3.00 (0.80)    | 3.03 (0.86)        | 0.03 (0.92) | 0.248 | 0.804  | 76                          | 15.91 (4.50)             | 17.21 (3.78)                 | 1.30 (5.74)  | 1.977  | 0.052  |
| Workplace 4  | 85                | 2.94 (0.88)    | 3.24 (1.08)        | 0.29 (1.15) | 2.352 | 0.021  | 88                          | 15.02 (4.83)             | 17.47 (5.81)                 | 2.44 (5.87)  | 3.903  | <0.001 |
| Workplace 5  | 83                | 2.89 (0.91)    | 3.40 (0.92)        | 0.51 (1.20) | 3.831 | <0.001 | 79                          | 14.61 (4.87)             | 17.71 (4.77)                 | 3.10 (5.50)  | 5.008  | <0.001 |
| Workplace 6  | 73                | 3.07 (0.84)    | 3.68 (0.91)        | 0.62 (1.14) | 4.628 | <0.001 | 69                          | 15.22 (5.22)             | 18.77 (5.38)                 | 3.55 (6.17)  | 4.778  | <0.001 |
| Workplace 7  | 56                | 3.14 (0.80)    | 3.14 (0.88)        | 0.00 (0.99) | 0.000 | 1.000  | 56                          | 14.66 (4.95)             | 16.05 (4.16)                 | -1.39 (5.07) | -2.058 | 0.044  |
| Workplace 8  | 62                | 2.76 (0.76)    | 2.89 (0.79)        | 0.13 (0.76) | 1.342 | 0.185  | 60                          | 14.13 (5.42)             | 16.67 (4.61)                 | 2.53 (5.00)  | 3.927  | <0.001 |
| Workplace 9  | 61                | 2.89 (0.78)    | 2.92 (0.86)        | 0.03 (0.93) | 0.275 | 0.784  | 61                          | 14.95 (5.07)             | 16.26 (4.84)                 | 1.31 (4.79)  | 2.138  | 0.037  |
| Workplace 10 | 62                | 3.05 (0.86)    | 3.95 (1.14)        | 0.90 (1.08) | 6.573 | <0.001 | 57                          | 12.74 (5.54)             | 20.39 (3.32)                 | 7.65 (5.52)  | 10.460 | <0.001 |
| Total        | 712               | 2.96 (0.83)    | 3.26 (0.97)        | 0.30 (1.05) | 7.712 | <0.001 | 696                         | 14.79 (5.02)             | 17.49 (4.92)                 | 2.70 (5.98)  | 11.91  | <0.001 |

**Table 5. Physical environment by organization**

| Organization   | Overall environment | Physical activity environment | Tobacco control environment | Nutritional/dietary environment | Total scores    |
|----------------|---------------------|-------------------------------|-----------------------------|---------------------------------|-----------------|
| Workplace 1    | 13.56               | 13.44                         | 14.06                       | 14.88                           | 55.94           |
| Workplace 2    | 13.75               | 14.63                         | 14.00                       | 14.75                           | 57.00           |
| Workplace 3    | 14.25               | 13.94                         | 14.75                       | 14.75                           | 57.69           |
| Workplace 4    | 14.00               | 14.88                         | 14.88                       | 15.00                           | 58.75           |
| Workplace 5    | 14.13               | 12.13                         | 13.50                       | 13.88                           | 53.63           |
| Workplace 6    | 13.81               | 14.94                         | 13.69                       | 13.75                           | 56.19           |
| Workplace 7    | 14.25               | 13.50                         | 14.00                       | 14.50                           | 56.25           |
| Workplace 8    | 14.38               | 13.00                         | 14.75                       | 14.00                           | 56.13           |
| Workplace 9    | 13.88               | 11.88                         | 14.00                       | 13.88                           | 53.63           |
| Workplace 10   | 12.88               | 11.81                         | 13.75                       | 14.13                           | 52.56           |
| Average scores | 13.89               | 13.42                         | 14.14                       | 14.35                           | 55.78           |
| t (p)          | 100.349 (<0.001)    | 35.315 (<0.001)               | 92.092 (<0.001)             | 95.833 (<0.001)                 | 90.604 (<0.001) |

**Table 6. Descriptive results for intervention implementation measured by Chinese Workplace Health Scorecard**

| Workplace    | Overall health promotion |           | Specialized health promotion |           | Total score of intervention implementation |           |
|--------------|--------------------------|-----------|------------------------------|-----------|--------------------------------------------|-----------|
|              | Mean                     |           | Mean                         |           | Mean                                       |           |
|              | Collection point         |           | Collection point             |           | Collection point                           |           |
|              | 12 months                | 24 months | 12 months                    | 24 months | 12 months                                  | 24 months |
| Workplace 1  | 4.250                    | 4.583     | 4.800                        | 4.826     | 4.525                                      | 4.705     |
| Workplace 2  | 3.583                    | 4.667     | 3.730                        | 4.734     | 3.657                                      | 4.701     |
| Workplace 3  | 4.083                    | 4.167     | 4.228                        | 3.624     | 4.156                                      | 3.896     |
| Workplace 4  | 4.083                    | 4.500     | 3.948                        | 4.694     | 4.016                                      | 4.597     |
| Workplace 5  | 3.750                    | 4.333     | 3.594                        | 4.090     | 3.672                                      | 4.212     |
| Workplace 6  | 4.667                    | 4.833     | 4.554                        | 4.602     | 4.611                                      | 4.718     |
| Workplace 7  | 4.000                    | 3.417     | 4.302                        | 3.280     | 4.151                                      | 3.349     |
| Workplace 8  | 2.833                    | 4.083     | 3.494                        | 4.612     | 3.164                                      | 4.348     |
| Workplace 9  | 4.583                    | 4.250     | 4.674                        | 4.454     | 4.629                                      | 4.352     |
| Workplace 10 | 4.417                    | 4.833     | 4.284                        | 4.720     | 4.351                                      | 4.777     |
| Average      | 4.025                    | 4.367     | 4.161                        | 4.364     | 4.093                                      | 4.365     |

**Table 7. Descriptive results for workplace health culture measured by Workplace Health Culture Scale**

| Workplace    | Individual health culture Mean(SD) | Adverse health behaviors of direct leadership Mean(SD) | Adverse health effects of direct leadership Mean(SD) | Beneficial health effects of direct leadership Mean(SD) | Overall health culture Mean(SD) | Total average score of workplace health culture Mean(SD) |
|--------------|------------------------------------|--------------------------------------------------------|------------------------------------------------------|---------------------------------------------------------|---------------------------------|----------------------------------------------------------|
|              | Collection point 24 months         | Collection point 24 months                             | Collection point 24 months                           | Collection point 24 months                              | Collection point 24 months      | Collection point 24 months                               |
| Workplace 1  | 4.62 (0.55)                        | 3.99 (1.35)                                            | 4.06 (1.22)                                          | 4.52 (0.62)                                             | 4.56 (0.58)                     | 4.35 (0.63)                                              |
| Workplace 2  | 4.41 (0.64)                        | 4.01 (1.24)                                            | 3.89 (1.15)                                          | 4.00 (0.75)                                             | 4.09 (0.74)                     | 4.09 (0.54)                                              |
| Workplace 3  | 4.46 (0.52)                        | 4.06 (1.13)                                            | 4.21 (1.11)                                          | 4.28 (0.63)                                             | 4.37 (0.58)                     | 4.27 (0.54)                                              |
| Workplace 4  | 4.41 (0.71)                        | 3.89 (1.11)                                            | 3.75 (1.14)                                          | 4.26 (0.80)                                             | 4.26 (0.75)                     | 4.11 (0.69)                                              |
| Workplace 5  | 4.09 (0.86)                        | 2.87 (1.30)                                            | 3.04 (1.28)                                          | 3.91 (0.84)                                             | 3.89 (0.74)                     | 3.56 (0.60)                                              |
| Workplace 6  | 4.50 (0.54)                        | 3.99 (1.37)                                            | 3.92 (1.31)                                          | 4.34 (0.57)                                             | 4.44 (0.56)                     | 4.23 (0.62)                                              |
| Workplace 7  | 4.44 (0.52)                        | 3.83 (1.09)                                            | 3.86 (1.07)                                          | 4.12 (0.66)                                             | 4.22 (0.61)                     | 4.09 (0.55)                                              |
| Workplace 8  | 4.54 (0.58)                        | 3.89 (1.42)                                            | 3.98 (1.34)                                          | 4.45 (0.66)                                             | 4.66 (0.52)                     | 4.30 (0.56)                                              |
| Workplace 9  | 4.41 (0.62)                        | 3.69 (1.41)                                            | 4.08 (1.02)                                          | 4.07 (0.71)                                             | 4.40 (0.71)                     | 4.13 (0.59)                                              |
| Workplace 10 | 4.80 (0.38)                        | 4.21 (1.46)                                            | 4.31 (1.23)                                          | 4.72 (0.56)                                             | 4.70 (0.62)                     | 4.55 (0.66)                                              |
| Average      | 4.46 (0.63)                        | 3.83 (1.33)                                            | 3.89 (1.24)                                          | 4.27 (0.73)                                             | 4.35 (0.69)                     | 4.16 (0.65)                                              |



**Table 8. Descriptive results for workplace physical environment measured by Direct Observation Scoring Table**

| Workplace    | Overall environment Mean |           | Physical activity environment Mean |           | Tobacco control environment Mean |           | Nutritional/dietary environment Mean |           | Total score of workplace physical environment Mean |           |
|--------------|--------------------------|-----------|------------------------------------|-----------|----------------------------------|-----------|--------------------------------------|-----------|----------------------------------------------------|-----------|
|              | Collection point         |           | Collection point                   |           | Collection point                 |           | Collection point                     |           | Collection point                                   |           |
|              | 12 months                | 24 months | 12 months                          | 24 months | 12 months                        | 24 months | 12 months                            | 24 months | 12 months                                          | 24 months |
| Workplace 1  | 13.75                    | 13.375    | 14.25                              | 12.625    | 14.50                            | 13.625    | 15.00                                | 14.75     | 57.5                                               | 54.375    |
| Workplace 2  | 13.25                    | 14.25     | 15.00                              | 14.25     | 13.75                            | 14.25     | 14.75                                | 14.75     | 56.75                                              | 57.5      |
| Workplace 3  | 13.75                    | 14.75     | 13.25                              | 14.625    | 14.50                            | 15.00     | 14.75                                | 14.75     | 56.25                                              | 59.125    |
| Workplace 4  | 14.50                    | 13.50     | 15.00                              | 14.75     | 14.75                            | 15.00     | 15.00                                | 15.00     | 59.25                                              | 58.25     |
| Workplace 5  | 14.00                    | 14.25     | 12.00                              | 12.25     | 12.50                            | 14.50     | 14.00                                | 13.75     | 52.5                                               | 54.75     |
| Workplace 6  | 14.00                    | 13.625    | 15.00                              | 14.875    | 13.50                            | 13.875    | 14.50                                | 13.00     | 57                                                 | 55.375    |
| Workplace 7  | 14.00                    | 14.50     | 13.00                              | 14.00     | 13.25                            | 14.75     | 14.50                                | 14.50     | 54.75                                              | 57.75     |
| Workplace 8  | 14.00                    | 14.75     | 12.50                              | 13.50     | 15.00                            | 14.50     | 13.50                                | 14.50     | 55                                                 | 57.25     |
| Workplace 9  | 14.00                    | 13.75     | 12.50                              | 11.25     | 14.00                            | 14.00     | 13.50                                | 14.25     | 54                                                 | 53.25     |
| Workplace 10 | 12.50                    | 13.25     | 12.00                              | 11.625    | 13.50                            | 14.00     | 14.00                                | 14.25     | 52                                                 | 53.125    |
| Average      | 13.81                    | 13.97     | 13.52                              | 13.41     | 13.95                            | 14.36     | 14.40                                | 14.36     | 55.68                                              | 56.1      |
