# Supplementary material for: The roles of health culture and physical environment in workplace health promotion: a two-year prospective intervention study in China
Source: PubMed Central journal article supplement (PMC5887264; doi:10.1186/s12889-018-5361-5), 2018-04-05
Supplement: 12889_2018_5361_MOESM4_ESM.pdf [file 12889_2018_5361_MOESM4_ESM.pdf]

## Supplementary materials for data testing

- ① For self-rated health improvement, we found that ICC ( intraclass correlation coefficient)=  
 $0.07003/(0.07003+1.0327)=0.0635$ . Among all the 10 workplaces, there were only two  
 significant random effect.

Parameter Estimation of Covariance (SRH improvement as a dependent variable)

| Covariance parameter | Variable  | Parameter Estimation | Standard error |
|----------------------|-----------|----------------------|----------------|
| Intercept            | Workplace | 0.07003              | 0.04053        |
| Residual             |           | 1.0327               | 0.05513        |

Fixed effect(SRH as a dependent variable)

| Effect    | Parameter Estimation | Standard error | Degrees of freedom | t    | P      |
|-----------|----------------------|----------------|--------------------|------|--------|
| Intercept | 0.2971               | 0.0921         | 9                  | 3.23 | 0.0104 |

Random effect(SRH as a dependent variable)

| Effect    | Variable     | Parameter Estimation | Std Err | Pred t | P             |
|-----------|--------------|----------------------|---------|--------|---------------|
| Intercept | Workplace 1  | -0.2351              | 0.1411  | -1.67  | 0.0961        |
| Intercept | Workplace 2  | 0.4897               | 0.1378  | 3.55   | <b>0.0004</b> |
| Intercept | Workplace 3  | -0.00251             | 0.1285  | -0.02  | 0.9844        |
| Intercept | Workplace 4  | 0.1774               | 0.1292  | 1.37   | 0.1699        |
| Intercept | Workplace 5  | 0.2657               | 0.1328  | 2      | <b>0.0458</b> |
| Intercept | Workplace 6  | -0.07634             | 0.1368  | -0.56  | 0.577         |
| Intercept | Workplace 7  | -0.04278             | 0.1273  | -0.34  | 0.7369        |
| Intercept | Workplace 8  | -0.2128              | 0.1383  | -1.54  | 0.1244        |
| Intercept | Workplace 9  | -0.2275              | 0.1313  | -1.73  | 0.0835        |
| Intercept | Workplace 10 | -0.1357              | 0.1378  | -0.98  | 0.325         |

- ② For mental health improvement, we found that ICC( intraclass correlation coefficient)=  
 $4.9877/(4.9877+31.7975)=0.13559$ . Among all the 10 workplaces, there were only two  
 significant random effects.

Parameter Estimation of Covariance (mental health improvement as a dependent variable)

| Covariance parameter | Variable  | Parameter Estimation | Standard error |
|----------------------|-----------|----------------------|----------------|
| Intercept            | Workplace | 4.9877               | 2.6036         |
| Residual             |           | 31.7975              | 1.7172         |

| Fixed effect(SRH as a dependent variable) |                      |                |                    |      |        |
|-------------------------------------------|----------------------|----------------|--------------------|------|--------|
| Effect                                    | Parameter Estimation | Standard error | Degrees of freedom | t    | P      |
| Intercept                                 | 2.6492               | 0.7387         | 9                  | 3.59 | 0.0059 |

  

| Random effect(SRH as a dependent variable) |              |                      |              |       |        |
|--------------------------------------------|--------------|----------------------|--------------|-------|--------|
| Effect                                     | Variable     | Parameter Estimation | Std Err Pred | t     | P      |
| Intercept                                  | Workplace 1  | -3.6289              | 0.9745       | -3.72 | 0.0002 |
| Intercept                                  | Workplace 2  | 4.497                | 0.9711       | 4.63  | <.0001 |
| Intercept                                  | Workplace 3  | -0.1921              | 0.9007       | -0.21 | 0.8312 |
| Intercept                                  | Workplace 4  | 0.4183               | 0.9163       | 0.46  | 0.6482 |
| Intercept                                  | Workplace 5  | 0.8253               | 0.9376       | 0.88  | 0.3791 |
| Intercept                                  | Workplace 6  | -1.0128              | 0.9559       | -1.06 | 0.2897 |
| Intercept                                  | Workplace 7  | 1.6516               | 0.9007       | 1.83  | 0.0671 |
| Intercept                                  | Workplace 8  | -1.2112              | 0.9587       | -1.26 | 0.2069 |
| Intercept                                  | Workplace 9  | -1.2424              | 0.9222       | -1.35 | 0.1784 |
| Intercept                                  | Workplace 10 | -0.1047              | 0.9617       | -0.11 | 0.9133 |

③ In summary, the results of testing showed that our data appeared not applicable and necessary to multi-level analysis. First, the two ICC were small. Second, the difference between the workplace level was very small and almost not statistical significant. Third, the demographic characteristics of workers from each organization seem to be similar. Therefore, we believe that multiple linear regressions might be suitable.
